# Supplementary material for: Identifying Optimal Vaccination Strategies for Serogroup A Neisseria meningitidis Conjugate Vaccine in the African Meningitis Belt
Source: PLoS One. 2013 May 9;8(5):e63605. doi: 10.1371/journal.pone.0063605 (PMC3650081; doi:10.1371/journal.pone.0063605)
Supplement: Table S1 — Model structure. (DOCX) [file pone.0063605.s001.docx]

**Supporting Information Table S1**

**Model structure**

The following set of partial differential equations defines the rates at which the simulated population moves between model states:

In which:

- NS, NC, LS, LC, HS, HC, and D, are population states, where N=No protection, L = Low protection, H = High protection, S = Susceptible, C = Colonized, and D = Diseased; X(t) is the total population.
- μ(t,a) and ν(t) are time-dependent birth and death rates, respectively. Birth rate also depends on age as individuals are only born into the age=0 group
- ωL(a) is the age-dependent rate at which low protection wanes to no protection and ωH(a) is the age-dependent rate at which high protection wanes to low protection
- λ(t,a) is the time- and age-dependent force of infection
- γ(t,a) is the time- and age-dependent rate of vaccination
- σ(a) is the age-dependent rate of invasive disease among colonized persons
- αL and αH are the efficacy of low and high antibody at preventing colonization
- βL and βH are the efficacy of low and high antibody at preventing invasive disease
- ρC and ρD are the rates of recovery from colonization and invasive disease, respectively
